# Supplementary material for: Power characteristics of spinel cathodes correlated with elastic softness and phase transformation for high-power lithium-ion batteries
Source: Royal Society of Chemistry journal article supplement (doi:10.1039/c6ta08882a), 2017-01-01
Supplement: c6ta08882a1.pdf [file c6ta08882a1.pdf]

## *Supporting Information for*

# Power characteristics of spinel cathode correlated with elastic softness and phase transformation for high-power lithium-ion batteries

*Jin-Myoung Lim,<sup>a,†</sup> Rye-Gyeong Oh,<sup>b,†</sup> Woosuk Cho,<sup>b</sup> Kyeongjae Cho,<sup>\*,c</sup> Maenghyo Cho,<sup>\*,a</sup> and Min-Sik Park<sup>\*,d</sup>*

<sup>a</sup> Department of Mechanical and Aerospace Engineering, Seoul National University, 1 Gwanak-ro, Gwanak-gu, Seoul 08826, the Republic of Korea

<sup>b</sup> Advanced Batteries Research Center, Korea Electronics Technology Institute, 25 Saenari-ro, Bundang-gu, Seongnam 13509, the Republic of Korea

<sup>c</sup> Department of Materials Science and Engineering and Department of Physics, University of Texas at Dallas, Richardson, TX 75080, USA

<sup>d</sup> Department of Advanced Materials Engineering for Information and Electronics, Kyung Hee University, 1732 Deogyong-daero, Gi-heung-gu, Yongin 17104, the Republic of Korea

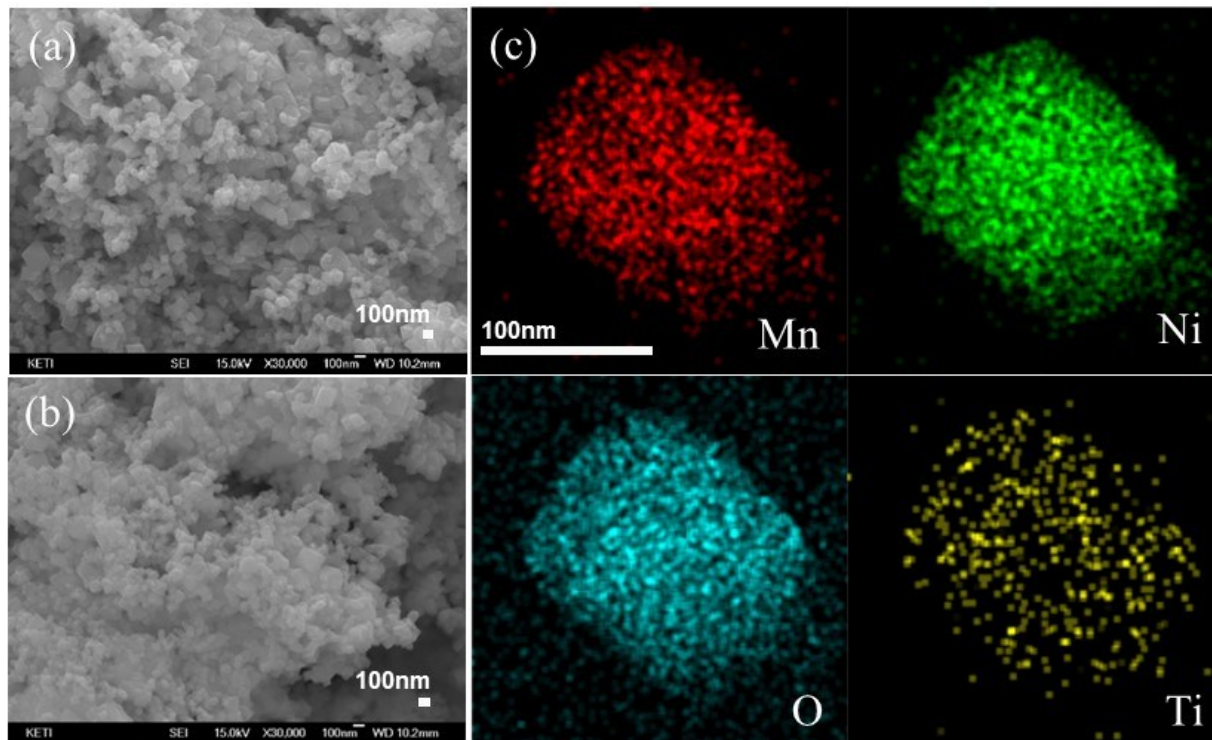

**Fig. S1.** (a, b) FESEM images of (a) LNMO and (b) LNMTO nanopowders, and (c) EDS mapping images of ion-sliced HRTEM for Mn, Ni, O, and Ti ions in a LNMTO nanoparticle.

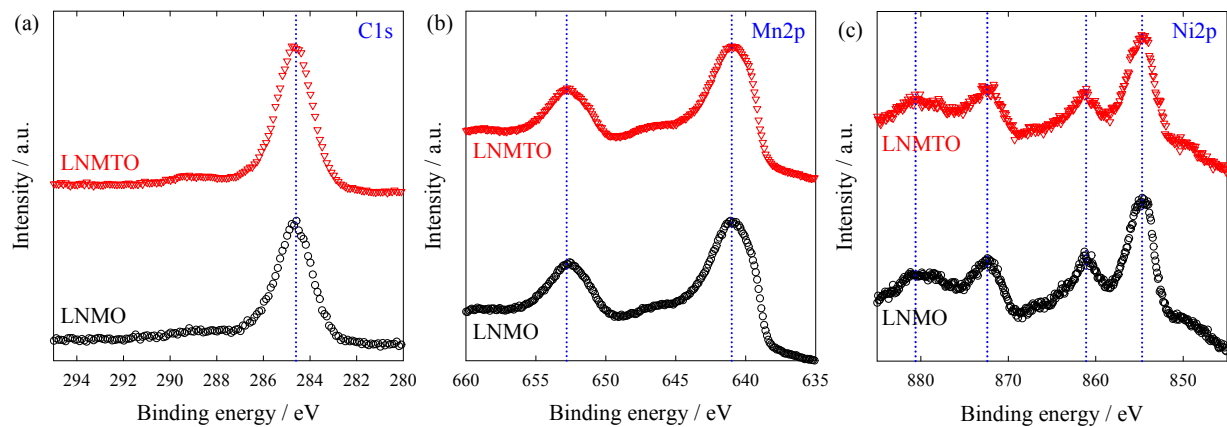

**Fig. S2.** XPS spectra of (a) C1s, (b) Mn2p, and (c) Ni2p for LNMO (black circles) and LNMTO (red triangles) after Ar ion sputtering for 300 s.

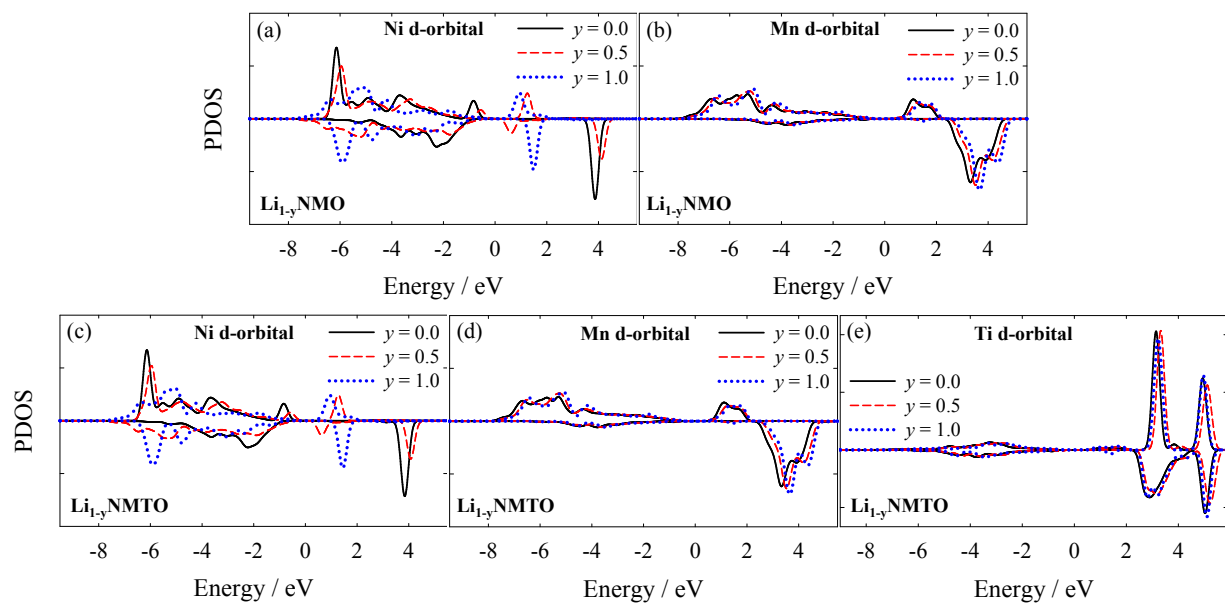

**Fig. S3.** PDOS of (a) Ni and (b) Mn d-orbitals in  $L_{1-y}NMO$ , and (c) Ni, (d) Mn, and (e) Ti d-orbitals in  $L_{1-y}NMTO$  with respect to the inverse Li content,  $y = 0$  (black solid line), 0.5 (red dashed line), and 1.0 (blue dotted line).

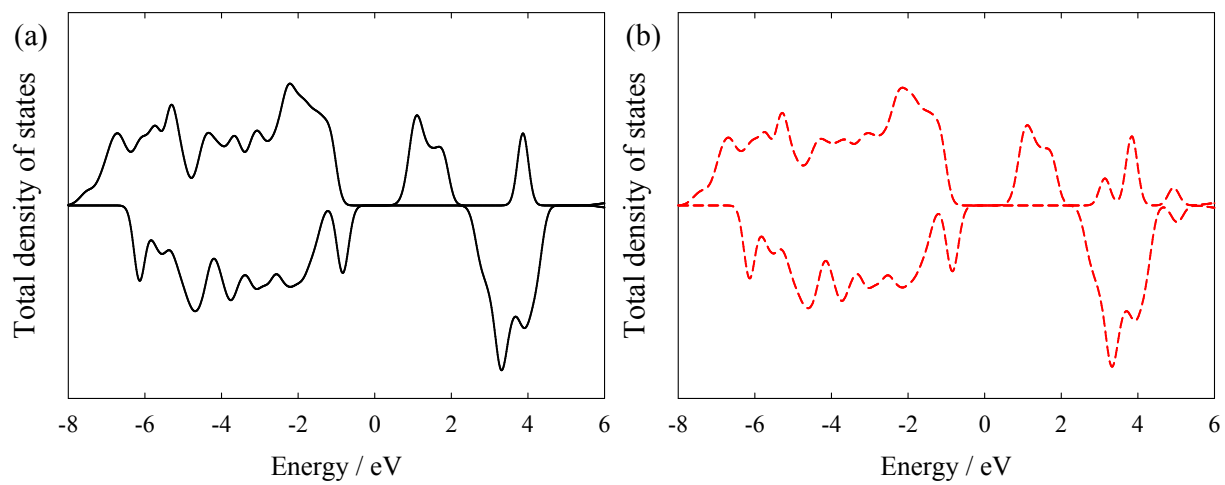

**Fig. S4.** Total density of states of (a) LNMO (black solid line) and (b) LNMTO (red dashed line).

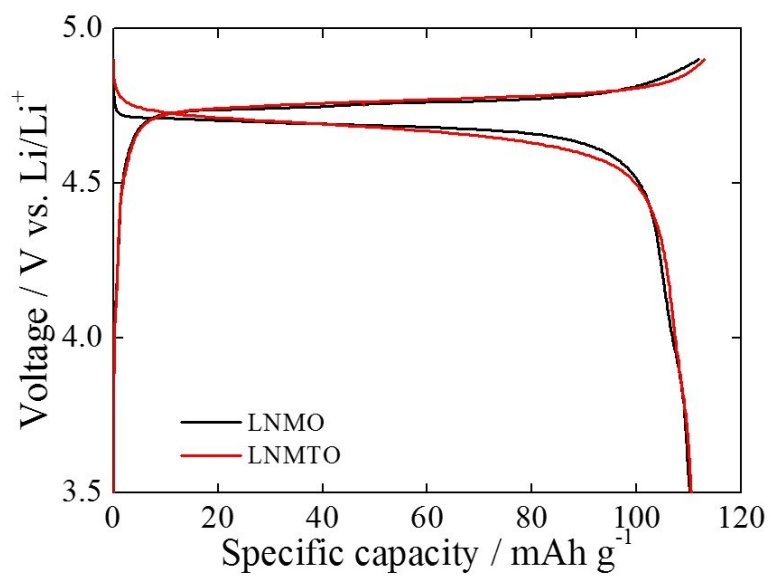

**Fig. S5.** Charge-discharge profiles of LNMO (black lines) and LNMTO (red lines) at a specific current of 80 mA g<sup>-1</sup>.
